# Supplementary material for: TCPP/MgO-loaded PLGA microspheres combining photodynamic antibacterial therapy with PBM-assisted fibroblast activation to treat periodontitis
Source: Royal Society of Chemistry journal article supplement (doi:10.1039/d2bm01959k), 2023-01-01
Supplement: d2bm01959k1.pdf [file d2bm01959k1.pdf]

## Supporting Information

### TCPP/MgO-loaded PLGA microsphere combining photodynamic anti-bacteria with PBM-assisted fibroblast activation to treat periodontitis

Wanmeng Wang †, Yunjia Song †, Yuan Tian , Bo Chen , Yunkai Liang , Yu Liang , Changyi Li \* and Ying Li \*

School of Dentistry, Tianjin Medical University, Tianjin 300070, China;

\* Correspondence: lichangyi@tmu.edu.cn; yingli@tmu.edu.cn

† These authors contributed equally to this work.

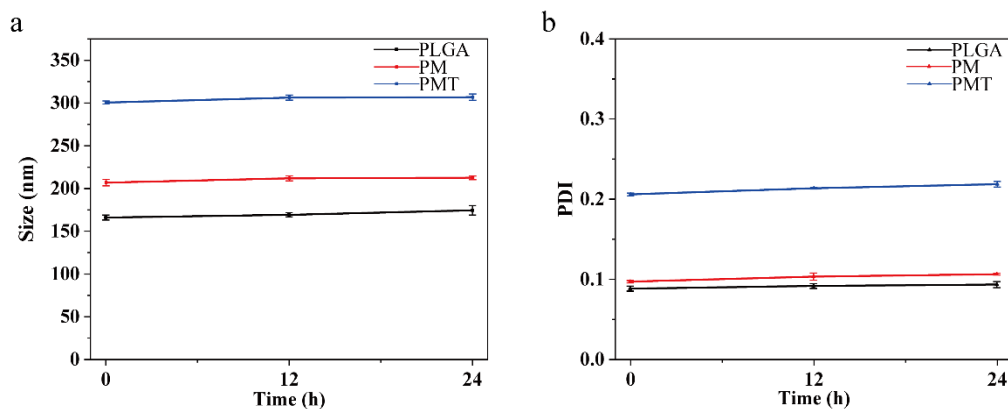

**Fig. S1** Size (a) and PDI (b) of PLGA, PM and PMT microspheres determined during 24 h storage period in PBS (pH=7.4).

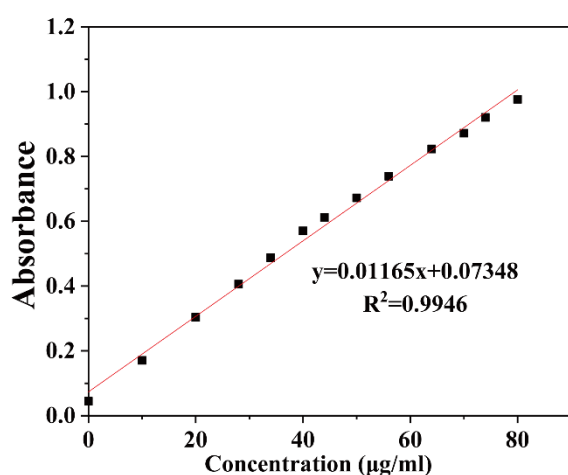

**Fig. S2** The standard curve of TCPP in DMSO.

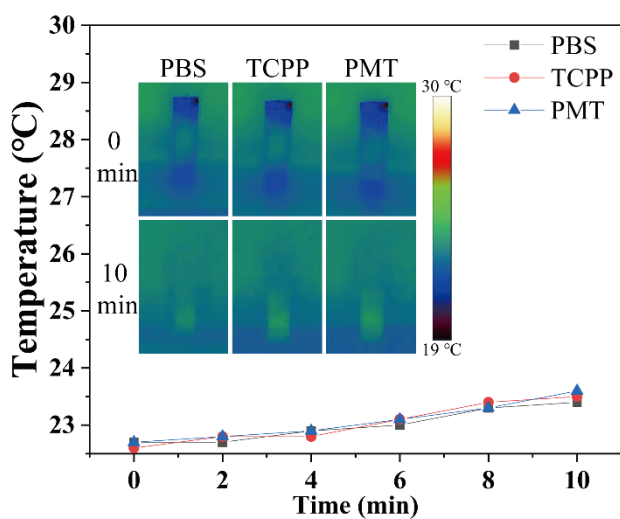

**Fig. S3** Photothermal curves of different samples under laser irradiation for 10 min (75 mW cm<sup>-2</sup>).

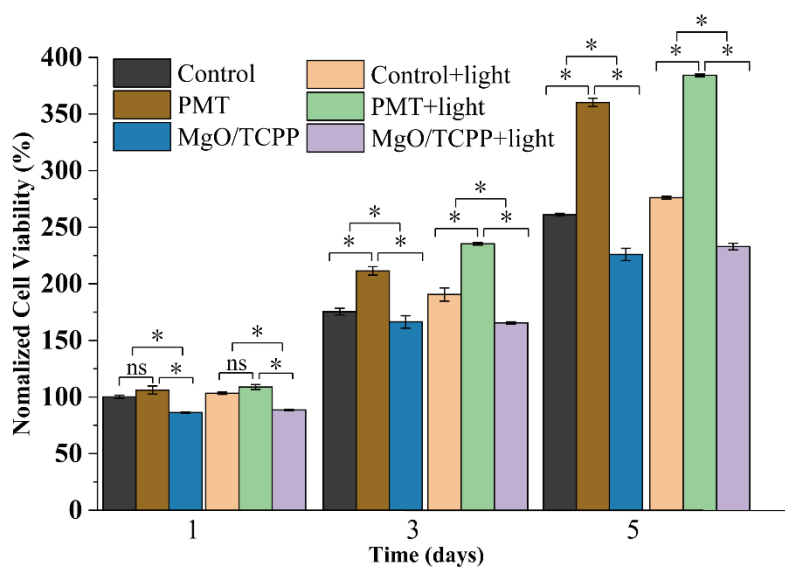

**Fig. S4** Fibroblasts viability cultured with PMT and free MgO/TCPP with or without light. \* indicates statistical significance  $p < 0.05$ , ns means no statistical difference.

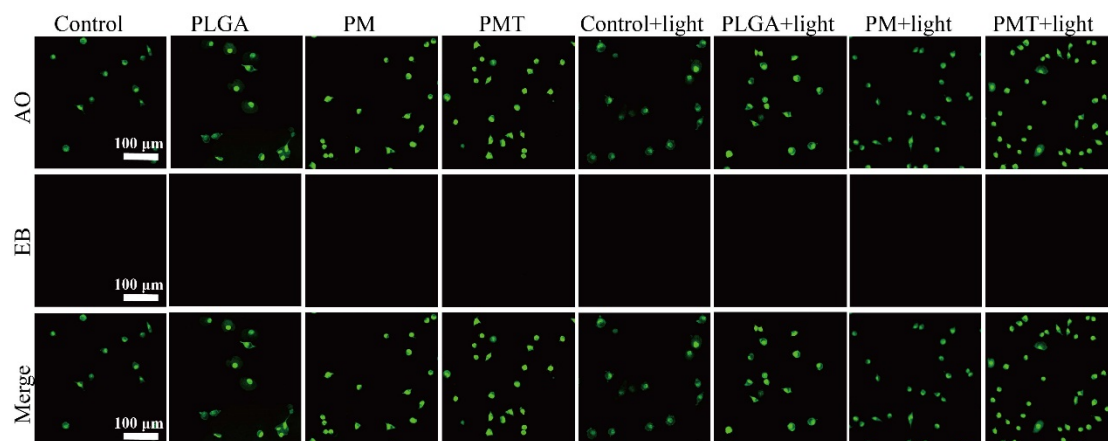

**Fig. S5** AO/EB staining of cells cultured with different microspheres. Scale bar = 100 μm.
